# Supplementary material for: Protein translocation channel of mitochondrial inner membrane and matrix-exposed import motor communicate via two-domain coupling protein
Source: eLife journal article supplement (doi:10.7554/elife.11897), 2015-12-29
Supplement: supp [file elife-11897-supp-v1.zip]

Archive with 1 entries (1 files):
- elife_poa_e11897_Figure_1_figure_supplement.pdf
